# Supplementary material for: Cost-effectiveness of consolidation durvalumab for inoperable stage III non-small cell lung cancer in Vietnam
Source: BMJ Open. 2024 Aug 30;14(8):e083895. doi: 10.1136/bmjopen-2024-083895 (PMC11407225; doi:10.1136/bmjopen-2024-083895)
Supplement: online supplemental file 2 [file bmjopen-14-8-s002.xlsx]

## Sheet: Sheet1
Input type		Mean																		Service cost
Co-payment for drug		1																			100% payment	80% payment	20% payment	Live value	Ref
Co-payment for services		1																		Check up	38700	30960	7740	38700	Trung bình hạng ĐB và hạng I
																				BV hạng đặc biệt	38700	30960	7740	38700	Thông tư 13, BYT
Cost summary																				BV hạng I	38700	30960	7740	38700	Thông tư 13, BYT
Item	Cost per cycle	#day per cycle	Maximum duration of treatment (days)	% assignment	Maximum cost	Note	Ref													Expert check up	200000	160000	40000	200000	Thông tư 13, BYT
Monitoring	405198	30.4375	9131.25	1	121559340															Full Bed-day	234350	187480	46870	234350	Trung bình hạng đặc biệt và hạng I
Durvalumab	4.77012e+07	14	365.25	1	1.24449e+09	Drug cost														Ngày giường bệnh nội khoa hạng đặc biệt	242200	193760	48440	242200	Thông tư 13, BYT
Sub- Paclitaxel + Carboplatin	3.19767e+06	21	126	0.2	3.8372e+06	21 days in 6 cycles	10.1200/JCO.1996.14.7.2054 Journal of Clinical Oncology 14, no. 7 (July 01, 1996) 2054-60.													Ngày giường bệnh nội khoa hạng I	226500	181200	45300	226500	Thông tư 13, BYT
Sub - Pemetrexed + Cisplatin	1.64683e+07	21	84	0.12	7.90478e+06	21 days in 4 cycles	Protocol NHS: https://www.uhs.nhs.uk/Media/UHS-website-2019/Docs/Chemotherapy-SOPs1/Lung-cancer-non-small-cellNSCLC/CisplatinandPemetrexedver12.pdf													Daytime bed-day	70305	56244	14061	70305	Bằng 0.3 giá giường nội trú, Thông tư 13
Sub - Cisplatin + Etoposide	1.28263e+06	21	94.5	0.02	115437	21 days in 3-6 cycles	Protocol NHS: https://www.uhs.nhs.uk/Media/UHS-website-2019/Docs/Chemotherapy-SOPs1/Lung-cancer-small-cellSCLC/Cisplatin-Etoposideintravenous.pdf													X-ray - 2 positions	56200	44960	11240	56200	Tính tổng các dịch vụ
Sub - Cisplatin + Vinblastine	1.41232e+06	28	112	0.03	169478	28 days in 4 cycles	https://doi.org/10.1007/bf00685511													ECG	26240	20992	5248	26240	Thông tư 13, BYT
Sub - Docetaxel	2.15087e+06	21	84	0.05	430174	21 days in 4 cycles	Protocol NHS: https://www.uhs.nhs.uk/Media/UHS-website-2019/Docs/Chemotherapy-SOPs1/Lung-cancer-non-small-cellNSCLC/Docetaxelver12.pdf													Thyroid test	160000	128000	32000	160000	Thông tư 13, BYT
Sub - Erlotinib	337500	28	9131.25	0.28	3.0818e+07	Continous oral taken	https://www.uhs.nhs.uk/Media/UHS-website-2019/Docs/Chemotherapy-SOPs1/Lung-cancer-non-small-cellNSCLC/Erlotinibver12.pdf													uCEA test	146480	117184	29296	146480	Thông tư 13, BYT
Sub - Pemetrexed	1.58944e+07	21	126	0.24	2.28879e+07	21 days in 6 cycles	https://www.uhs.nhs.uk/Media/UHS-website-2019/Docs/Chemotherapy-SOPs1/Lung-cancer-non-small-cellNSCLC/Pemetrexedmaintenancever11.pdf													Xét nghiệm chức năng gan	64500	51600	12900	64500	Tính tổng các dịch vụ
Sub - Afatinib	878062	28	336	0.06	632205	28 days in 12 cycles	https://www.uhs.nhs.uk/Media/UHS-website-2019/Docs/Chemotherapy-SOPs1/Lung-cancer-non-small-cellNSCLC/AfatinibVer1.pdf													Định lượng enzyme GPT (ALT)	21500	17200	4300	21500	Thông tư 13, BYT
AE - Anaemia	6.24952e+06	10	1																	Định lượng bilirubin toàn phần	21500	17200	4300	21500	Thông tư 13, BYT
AE - Dyspnoea	1512350	3	1																	Định lượng bilirubin trực tiếp	21500	17200	4300	21500	Thông tư 13, BYT
AE - Pneumonia	9.21192e+06	14	1																	Sinh hóa máu trong theo dõi sau điều trị	102300	81840	20460	102300	Tính tổng các dịch vụ
AE - Pneumonitis	9.5086e+06	14	1																	LDH	26900	21520	5380	26900	Thông tư 13, BYT
Administration for durvalumab	111421	14	365.25	1	2.90689e+06	Administration cost														Beta 2 Microglobulin	75400	60320	15080	75400	Thông tư 13, BYT
																				Chụp CT	1701000	1360800	340200	1701000	Sử dụng 32 dãy
																				Chụp CT Scanner đến 32 dãy có thuốc cản quang	632000	505600	126400	632000	Thông tư 13, BYT
																				Chụp CT Scanner 64 dãy đến 128 dãy có thuốc cản quang	1701000	1360800	340200	1701000	Thông tư 13, BYT
																				Chụp CT Scanner từ 256 dãy trở lên có thuốc cản quang	2985000	2388000	597000	2985000	Thông tư 13, BYT
			BSA	1.60583																Chụp PET/CT	19777000	15821600	3955400	19777000	Thông tư 13, BYT
			Kg	56.9625																Truyền tĩnh mạch ngoại trú	21400	17120	4280	21400	Thông tư 13, BYT
																				Tổng phân tích tế bào máu ngoại vị, bằng hệ thống tự động	106000	84800	21200	106000	Thông tư 39, BYT
Monitoring cost per cycle (1 month)																				Khối hồng cầu từ 350 ml máu toàn phần	757000	605600	151400	757000	Thông tư 17/2020/TT-BYT
Source	Service	Cycle			Quant	Cost/ service	Total cost													Khối tiểu cầu 1 đơn vị (từ 250 ml máu toàn phần)	141000	112800	28200	141000	Thông tư 17/2020/TT-BYT
HCP	Check up	1			0.33	38700	12771													APTT, PT, TT, fibrinogen test	198900	159120	39780	198900	Thông tư 13, BYT
HCP	Chest xray	1			0.33	56200	18546													Ventilator - 1 day	559000	447200	111800	559000	Thông tư 13, BYT
HCP	CEA, Cyfra 21-1 test	1			0.17	146480	24901.6													Tracheostomy	719000	575200	143800	719000	Thông tư 13, BYT
HCP	CT scan 64	1			0.17	1701000	289170													AFB trực tiếp nhuộm huỳnh quang	65600	52480	13120	65600	Thông tư 13, BYT
HCP	ECG	1			0.33	26240	8659.2													Ure/Creatinin niêuk	16100	12880	3220	16100	Thông tư 13, BYT
HCP	Blood tests	1			0.5	102300	51150																										Options	0.8	1
HCP	Thyroid test	1			0.5	160000	80000													Drug cost per mg (dong)														1	2
							405198													1	2	3	4	5	6	7	8	9	10	Options	Mean	1
																					Min	Max	Mean	95% CI Lower bound	95% CI Upper bound	100% payment	80% payment	20% payment	Live		95%CI Lower	2
Chemotherapy per cycle																				Durvalumab	83741.5	87230.7	83741.5	83741.5	83741.5	83741.5	66993.2	16748.3	83741.5		95%CI Upper	3
	Durvalumab																			Paclitaxel	7120	7720	7520	6659.47	8380.53	7520	6016	1504	7520
	Item	Dose (mg)	Dosing type	Dose required	Quant	Cost/ service	Total cost													Carboplatin	1800	1826.67	1801.78	1797.96	1805.59	1801.78	1441.42	360.356	1801.78
Targted treatment	Durvalumab	10	Kg	569.625	1	83741.5	4.77012e+07													Gemcitabine	795	795	795	795	795	795	636	159	795
Supportive drugs																				Cisplatin	4159.9	4900	4604.47	4521.34	4687.6	4604.47	3683.57	920.894	4604.47
																				Pemetrexed	19635	19635	19635	19635	19635	19635	15708	3927	19635
Administration	Daytime bed-day	1	Fixed	1	1	70305	70305													Etoposide	871.5	1099.98	969.953	931.691	1008.21	969.953	775.962	193.991	969.953
	NaCl 0.9%	569.625	Fixed	569.625	1	34.612	19715.8													Vinblastine	68000	68000	68000	68000	68000	68000	54400	13600	68000
	IV infusion	1	Fixed	1	1	21400	21400													Docetaxel	16099.8	17574.5	16707.1	16309.1	17105.1	16707.1	13365.7	3341.42	16707.1
							4.78127e+07													Vinorelbine	38325	46000	40795	36393.8	45196.2	40795	32636	8159	40795
Subsequent treatment per cycle																				Erlotinib	2250	2250	2250	2250	2250	2250	1800	450	2250
	Paclitaxel + Carboplatin																			Afatinib	17561.2	17561.2	17561.2	17561.2	17561.2	17561.2	14049	3512.25	17561.2
	Item	Dose (mg)	Dosing type	Dose required	Quant	Cost/ service	Total cost													NaCl 0.9%	9	168	34.612	31.6778	37.5462	34.612	27.6896	6.9224	34.612
Targted treatment	Paclitaxel	200	BSA	321.166	1	7520	2.41517e+06													Chlorphenamine	11.5	2000	126.299	29.3691	223.228	126.299	101.039	25.2597	126.299
	Carboplatin	300	AUC-6	300	1	1801.78	540533													Dexamethasone	112	264	153.882	128.014	179.751	153.882	123.106	30.7765	153.882
Supportive drugs	Chlorphenamine	10	Fixed	10	1	126.299	1262.99													Ondansetron	537.5	4375	2187.34	1631.86	2742.82	2187.34	1749.88	437.469	2187.34
	Dexamethasone	10	Fixed	10	1	153.882	1538.82													Glucose 5%	14.706	86.1	41.9072	35.9507	47.8636	41.9072	33.5257	8.38143	41.9072
	Ondansetron	8	Fixed	8	1	2187.34	17498.8													Metoclopramide	103	7325.1	3065.37	990.45	5140.29	3065.37	2452.29	613.074	3065.37
							0													Erythropoietin	8.3029	1150	105.454	85.6685	125.24	105.454	84.3633	21.0908	105.454
Administration	Daytime bed-day	1	Fixed	1	2	70305	140610													Prednisone	42	228	95.7091	61.5223	129.896	95.7091	76.5673	19.1418	95.7091
	NaCl 0.9%	500	Fixed	500	1	34.612	17306
	Glucose 5%	500	Fixed	500	1	41.9072	20953.6
	IV infusion	1	Fixed	1	2	21400	42800
							3.19767e+06
	Pemetrexed + Cisplatin
	Item	Dose (mg)	Dosing type	Dose required	Quant	Cost/ service	Total cost
Targted treatment	Cisplatin	75	BSA	120.437	1	4604.47	554549
	Pemetrexed	500	BSA	802.914	1	19635	1.57652e+07
Supportive drugs	Dexamethasone	4	Fixed	4	2	153.882	1231.06
	Ondansetron	8	Fixed	8	1	2187.34	17498.8
							0
Administration	Daytime bed-day	1	Fixed	1	1	70305	70305
	NaCl 0.9%	1100	Fixed	1100	1	34.612	38073.2
	IV infusion	1	Fixed	1	1	21400	21400
							1.64683e+07	Protocol NHS: https://www.uhs.nhs.uk/Media/UHS-website-2019/Docs/Chemotherapy-SOPs1/Lung-cancer-non-small-cellNSCLC/CisplatinandPemetrexedver12.pdf
	Cisplatin + Etoposide
	Item	Dose (mg)	Dosing type	Dose required	Quant	Cost/ service	Total cost
Targted treatment	Cisplatin	120	BSA	192.699	1	4604.47	887278
	Etoposide	80	BSA	128.466	1	969.953	124606
Supportive drugs	Dexamethasone	4	Fixed	4	1	153.882	615.53
	Ondansetron	8	Fixed	8	1	2187.34	17498.8
Administration	Daytime bed-day	1	Fixed	1	2	70305	140610
	NaCl 0.9%	1000	Fixed	1000	2	34.612	69224
	IV infusion	1	Fixed	1	2	21400	42800
				0			0
				0			0
				0			1.28263e+06	Protocol NHS: https://www.uhs.nhs.uk/Media/UHS-website-2019/Docs/Chemotherapy-SOPs1/Lung-cancer-small-cellSCLC/Cisplatin-Etoposideintravenous.pdf
	Cisplatin + Vinblastine
	Item	Dose (mg)	Dosing type	Dose required	Quant	Cost/ service	Total cost
Targted treatment	Cisplatin	100	BSA	160.583	1	4604.47	739399																			0	0
	Vinblastine	4	BSA	6.42332	1	68000	436785																			0	0
Supportive drugs	Dexamethasone	4	Fixed	4	1	153.882	615.53																			0	0
	Ondansetron	8	Fixed	8	1	2187.34	17498.8																			0	0
							0
Administration	Daytime bed-day	1	Fixed	1	2	70305	140610																			0	0
	NaCl 0.9%	500	Fixed	500	2	34.612	34612																			0	0
	IV infusion	1	Fixed	1	2	21400	42800
							1.41232e+06	https://doi.org/10.1007/bf00685511
	Docetaxel
	Item	Dose (mg)	Dosing type	Dose required	Quant	Cost/ service	Total cost
Targted treatment	Docetaxel	75	BSA	120.437	1	16707.1	2.01215e+06
Supportive drugs	Dexamethasone	8	Fixed	8	2	153.882	2462.12
	Metoclopramide	10	Fixed	10	1	3065.37	30653.7
Administration	Daytime bed-day	1	Fixed	1	1	70305	70305
	NaCl 0.9%	401.457	Fixed	401.457	1	34.612	13895.2
	IV infusion	1	Fixed	1	1	21400	21400
							2.15087e+06	https://www.uhs.nhs.uk/Media/UHS-website-2019/Docs/Chemotherapy-SOPs1/Lung-cancer-non-small-cellNSCLC/Docetaxelver12.pdf
	Erotinib
	Item	Dose (mg)	Dosing type	Dose required	Quant	Cost/ service	Total cost
Targted treatment	Erlotinib	150	Fixed	150	1	2250	337500
							337500	https://www.uhs.nhs.uk/Media/UHS-website-2019/Docs/Chemotherapy-SOPs1/Lung-cancer-non-small-cellNSCLC/Erlotinibver12.pdf
	Pemetrexed
	Item	Dose (mg)	Dosing type	Dose required	Quant	Cost/ service	Total cost
Targted treatment	Pemetrexed	500	BSA	802.914	1	19635	1.57652e+07
Supportive drugs	Dexamethasone	4	Fixed	4	2	153.882	1231.06
	Metoclopramide	10	Fixed	10	1	3065.37	30653.7
Administration	Daytime bed-day	1	Fixed	1	1	70305	70305
	NaCl 0.9%	160.583	Fixed	160.583	1	34.612	5558.09
	IV infusion	1	Fixed	1	1	21400	21400
							1.58944e+07	https://www.uhs.nhs.uk/Media/UHS-website-2019/Docs/Chemotherapy-SOPs1/Lung-cancer-non-small-cellNSCLC/Pemetrexedmaintenancever11.pdf
	Afatinib
	Item	Dose (mg)	Dosing type	Dose required	Quant	Cost/ service	Total cost
Targted treatment	Afatinib	50	Fixed	50	1	17561.2	878062
							878062	https://www.uhs.nhs.uk/Media/UHS-website-2019/Docs/Chemotherapy-SOPs1/Lung-cancer-non-small-cellNSCLC/AfatinibVer1.pdf
Adverse events
	Anemia
	Item	Dose (UI)	Dosing type	Dose required	Quant	Cost/ service	Total cost
	Full Bed-day	1	Fixed	10	1	234350	2343500
	Blood tests	1	Fixed	1	1	106000	106000
	APTT, PT, TT, fibrinogen test	1	Fixed	1	1	198900	198900
	Platelet transfusion (1 IU)	1	Fixed	1	1	141000	141000
	Erythropoietin	150	Kg	8544.38	3	105.454	2.70312e+06	(150 IU/kg 3 times wkly)
	RBC tranfusion (1 IU)	1	Fixed	1	1	757000	757000
							6.24952e+06
	Dyspnoea
	Item	Dose (mg)	Dosing type	Dose required	Quant	Cost/ service	Total cost
	Full Bed-day	3	Fixed	1	1	234350	234350
	Ventilator	1	Fixed	1	1	559000	559000
	Tracheostomy	1	Fixed	1	1	719000	719000
							1512350
	Pneumonia
	Item	Dose (mg)	Dosing type	Dose required	Quant	Cost/ service	Total cost
	Full Bed-day	14	Fixed	1	14	234350	3280900
	Liver function tests (GOT, GPT,etc)	1	Fixed	1	1	64500	64500
	Blood tests	1	Fixed	1	1	106000	106000
	Xray lung	1	Fixed	1	1	56200	56200
	CT scan	1	Fixed	1	1	1701000	1701000
	Creatinin test	1	Fixed	1	1	16100	16100
	AFB - Acid Fast Bacillus	1	Fixed	1	1	65600	65600
	Dexamethasone	4	Fixed	4	14	153.882	8617.41
	Ventilator	1	Fixed	1	7	559000	3913000
							9.21192e+06
	Pneumonitis
	Item	Dose (mg)	Dosing type	Dose required	Quant	Cost/ service	Total cost
	Full Bed-day	14	Fixed	1	14	234350	3280900
	Liver function tests (GOT, GPT,etc)	1	Fixed	1	1	64500	64500
	Blood tests	1	Fixed	1	1	106000	106000
	Xray lung	1	Fixed	1	1	56200	56200
	CT scan	1	Fixed	1	1	1701000	1701000
	Creatinin test	1	Fixed	1	1	16100	16100
	AFB - Acid Fast Bacillus	1	Fixed	1	1	65600	65600
	Prednisone	4	kg	227.85	14	95.7091	305302
	Ventilator	1	Fixed	1	7	559000	3913000
							9.5086e+06
